# Supplementary material for: Epithelial plasticity in COPD results in cellular unjamming due to an increase in polymerized actin
Source: PubMed Central journal article supplement (PMC8919336; doi:10.1242/jcs.258513), 2022-02-24
Supplement: joces-135-258513-s1.pdf [file joces-135-258513-s1.pdf]

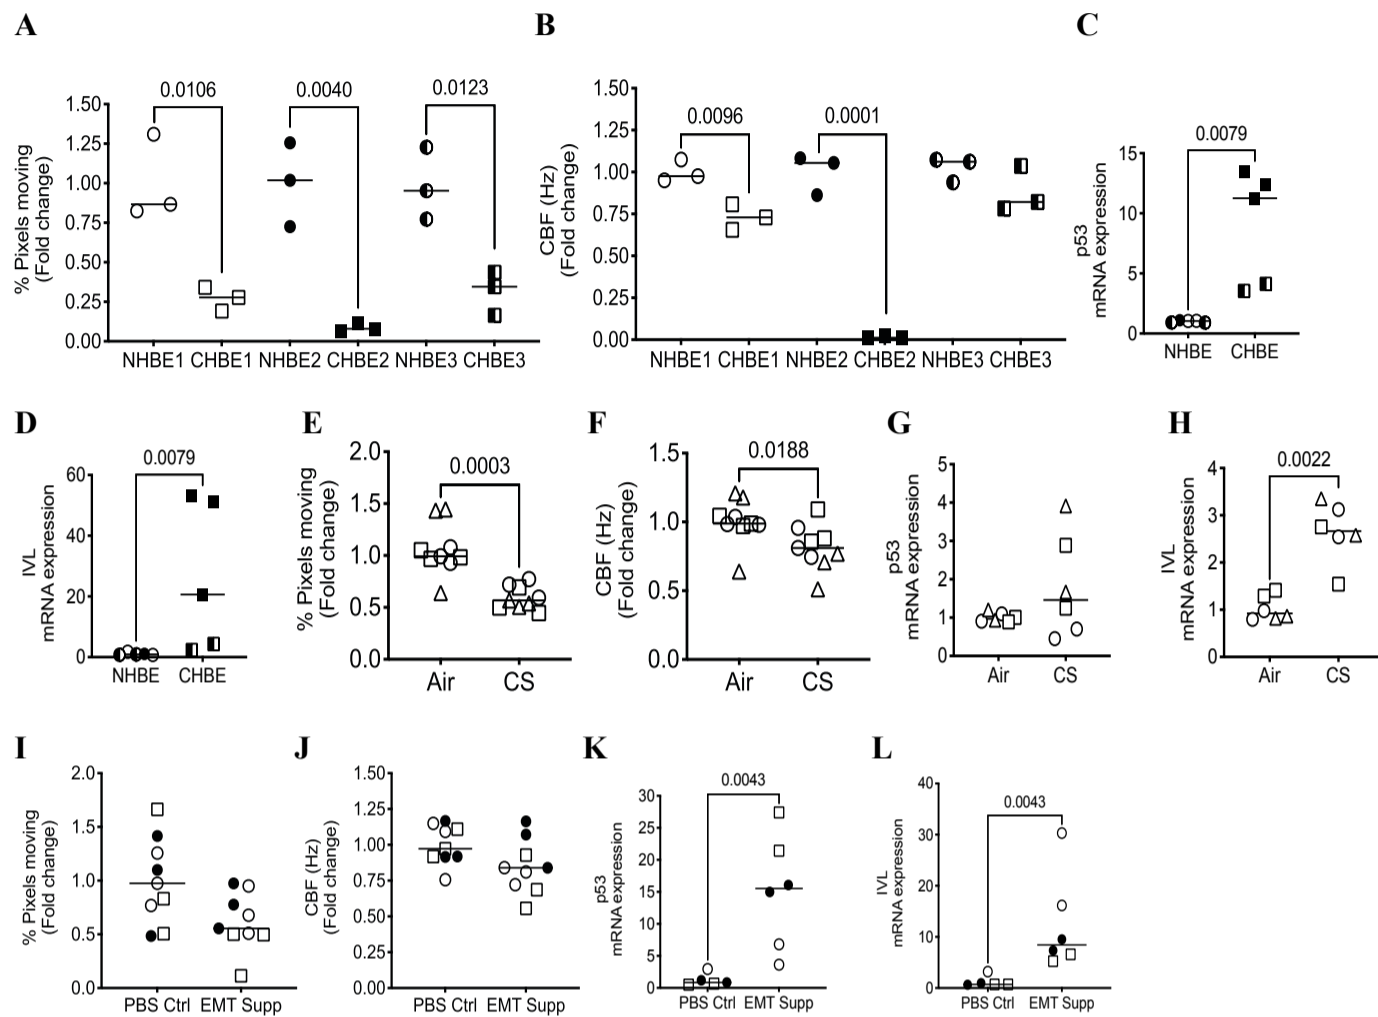

**Fig. S1. COPD epithelia, cigarette-smoke exposed non-diseased epithelia, and epithelial to mesenchymal induction in non-diseased epithelia display loss of ciliary function and increased mRNA expression of squamous metaplasia related markers.** (A) Percentage of moving cilia (% Pixels moving) were lower in COPD epithelia (CHBE) and (B) ciliary beat frequency (CBF) of CHBE were decreased as compared to gender and age-matched non-diseased epithelia (NHBE). Increased basal mRNA expression (normalized to GAPDH) of (C) p53 and (D) IVL in CHBE as compared to NHBE. (E) Percentage of moving cilia were lower and (F) CBF is decreased in cigarette-smoke (CS) exposed NHBE as compared to air exposed epithelia. Increased basal mRNA expression (normalized to GAPDH) of (G) p53 and (H) IVL in CS-exposed epithelia as compared to air control. NHBE were treated with 2X epithelial to mesenchymal transition supplement (EMT Supp.) to induce EMT and were compared to PBS Ctrl. (I) Percentage of moving cilia were lower in NHBE treated with EMT Supp as compared to PBS Ctrl (the difference was not statistically significant), although the (J) CBF was not altered in NHBE treated with EMT Supp. Increased basal mRNA expression (normalized to GAPDH) of (K) p53 and (L) IVL in primary NHBE treated with EMT Supp as compared to PBS Ctrl. Data is representative of 2 to 3 donors, 2 to 3 inserts per donor. Results are shown as median bars. Shapiro-Wilk normality test followed by Mann-Whitney test was performed.  $P$ -value  $< 0.05$  was considered statistically significant.

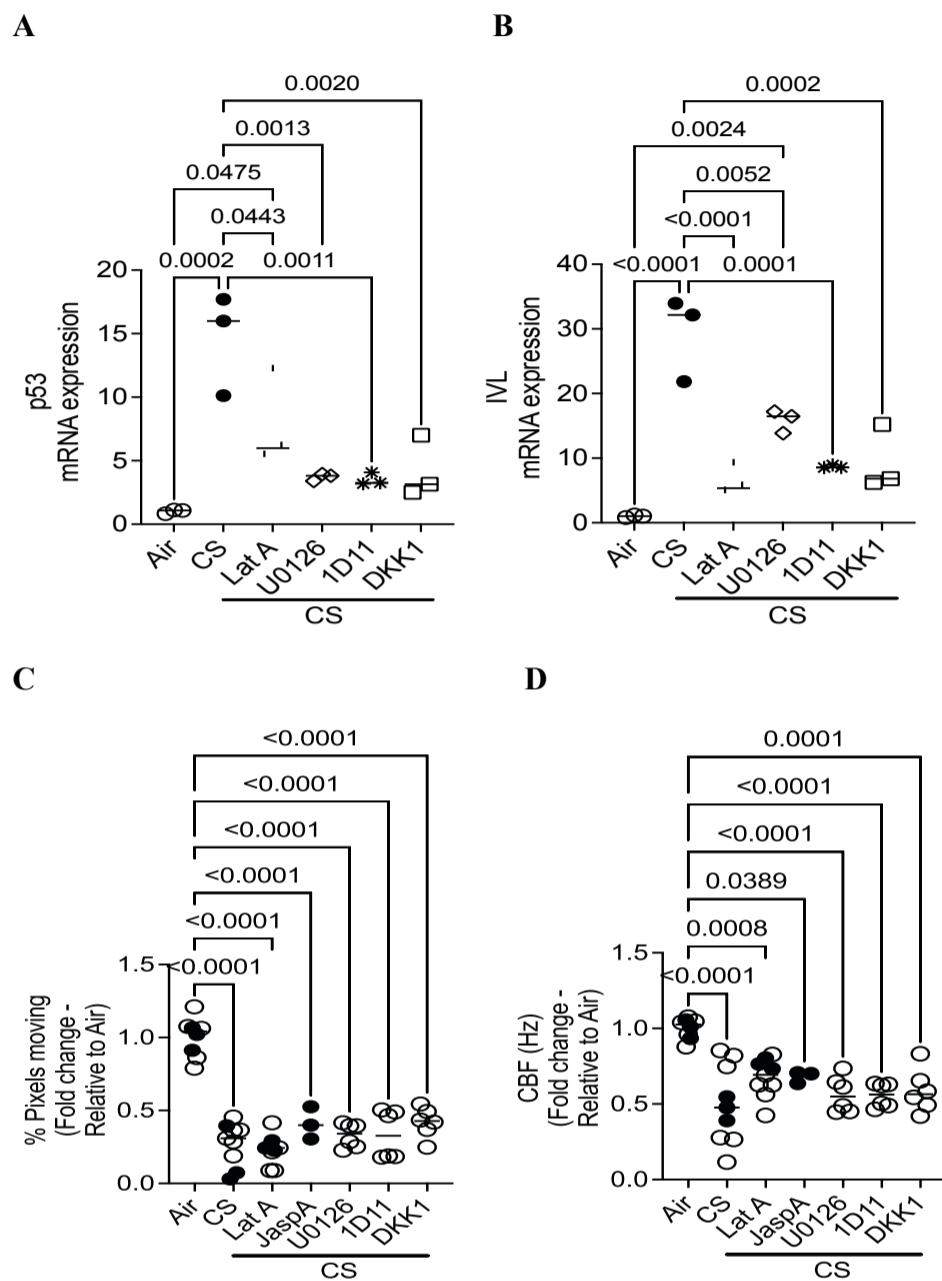

**Fig. S2. All identified pathway inhibitors decreased the CS-induced expression of squamous-metaplasia markers, but do not restore CS-induced decrease in percentage of moving cilia and ciliary beat frequency.** Decreased basal mRNA expression (normalized to GAPDH) of (A) p53 and (B) IVL in cigarette-smoke (CS) exposed non-diseased epithelia (NHBE) treated with actin depolymerizing agent (Lat A), MAPK kinase inhibitor (U0126), TGF $\beta$ 1 neutralizer (1D11), and antagonist of Wnt signaling pathway (DKK1). However, treatment with these identified pathway inhibitors did not protect against CS induced (C) lower percentage of moving cilia (% Pixels moving) and (D) decreased ciliary beat frequency (CBF). Data is representative of 1 to 2 donor, 3 to 6 inserts per donor. Results are shown as median bars. Shapiro-Wilk normality test followed by Kruskal-Wallis test was performed.  $P$ -value  $< 0.05$  was considered statistically significant.

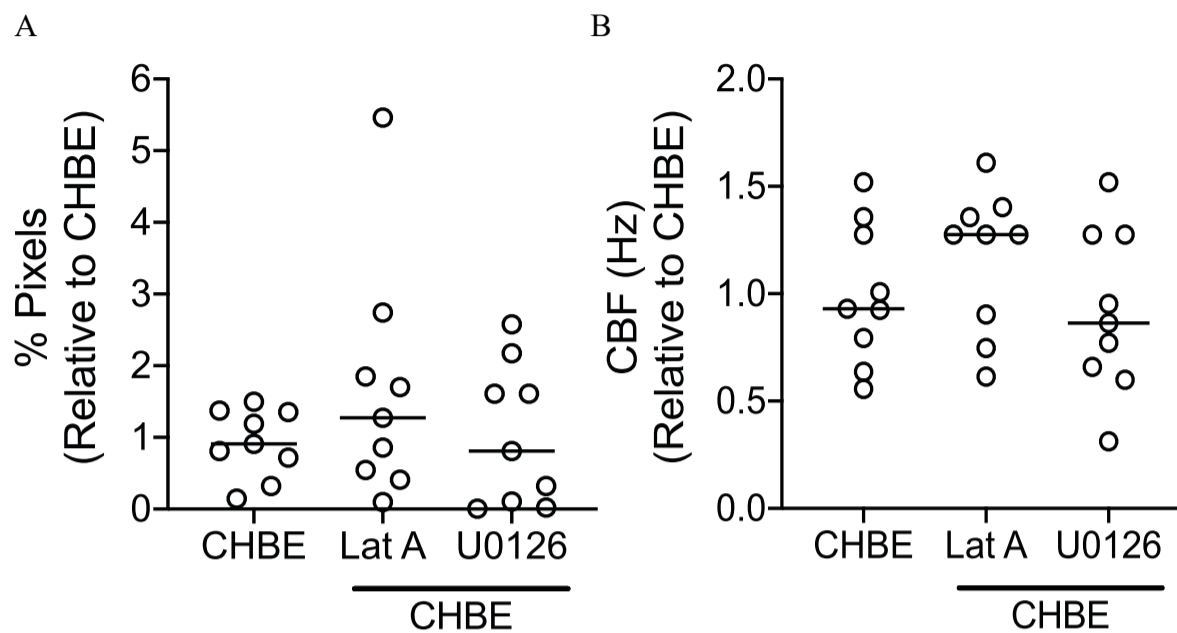

**Fig. S3. Pathway inhibitors, including that of of actin polymerization and MAPK kinase pathway do not improve the percentage of moving cilia and ciliary beat frequency of COPD epithelia.** Treating the COPD epithelia (CHBE) with actin polymerization inhibitor (Lat A) and MAPK kinase inhibitor (U0126) does not restore **(A)** percentage of moving cilia (% pixels) and **(B)** ciliary beat frequency (CBF). Data is representative of 9 inserts from 1 donor. Results are shown as median bars. Shapiro-Wilk normality test followed by Kruskal-Wallis test was performed. *P*-value < 0.05 was considered statistically significant.

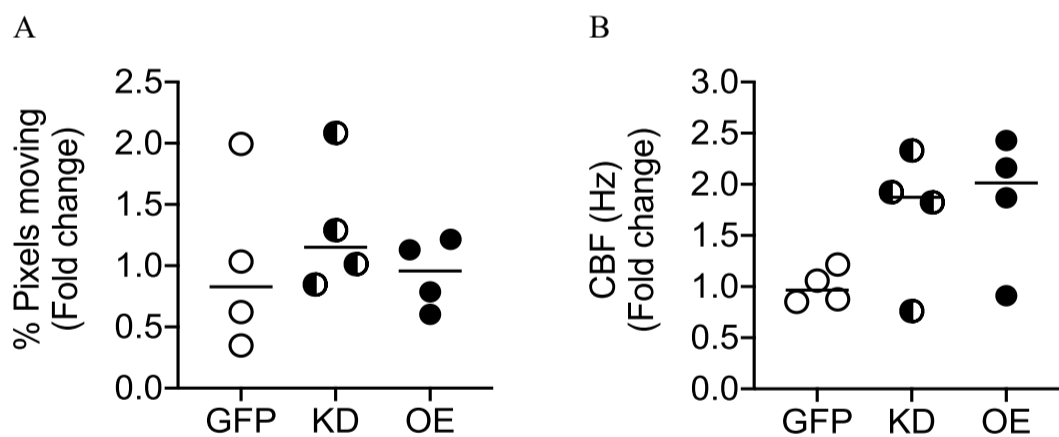

**Fig. S4. Percentage of moving cilia and ciliary beat frequency is not altered with knocked down or over expressed Cofilin 1.** Non-diseased epithelia (NHBE) were transduced with Adenovirus – Ad-GFP (GFP) as control or Ad-GFP-U6-h-CFL1-shRNA (KD) to knock down Cofilin 1 or Ad-GFP-h-CFL1 (OE) to overexpress Cofilin 1 at  $1 \times 10^{10}$  PFU/mL. The knockdown and overexpression of Cofilin 1 does not alter **(A)** Percentage of moving cilia (% pixels moving) and **(B)** ciliary beat frequency (CBF) of the NHBEs. Data is representative of 3 to 4 inserts from 1 donor. Results are shown as median bars. Shapiro-Wilk normality test followed by Kruskal-Wallis test was performed. *P*-value < 0.05 was considered statistically significant.

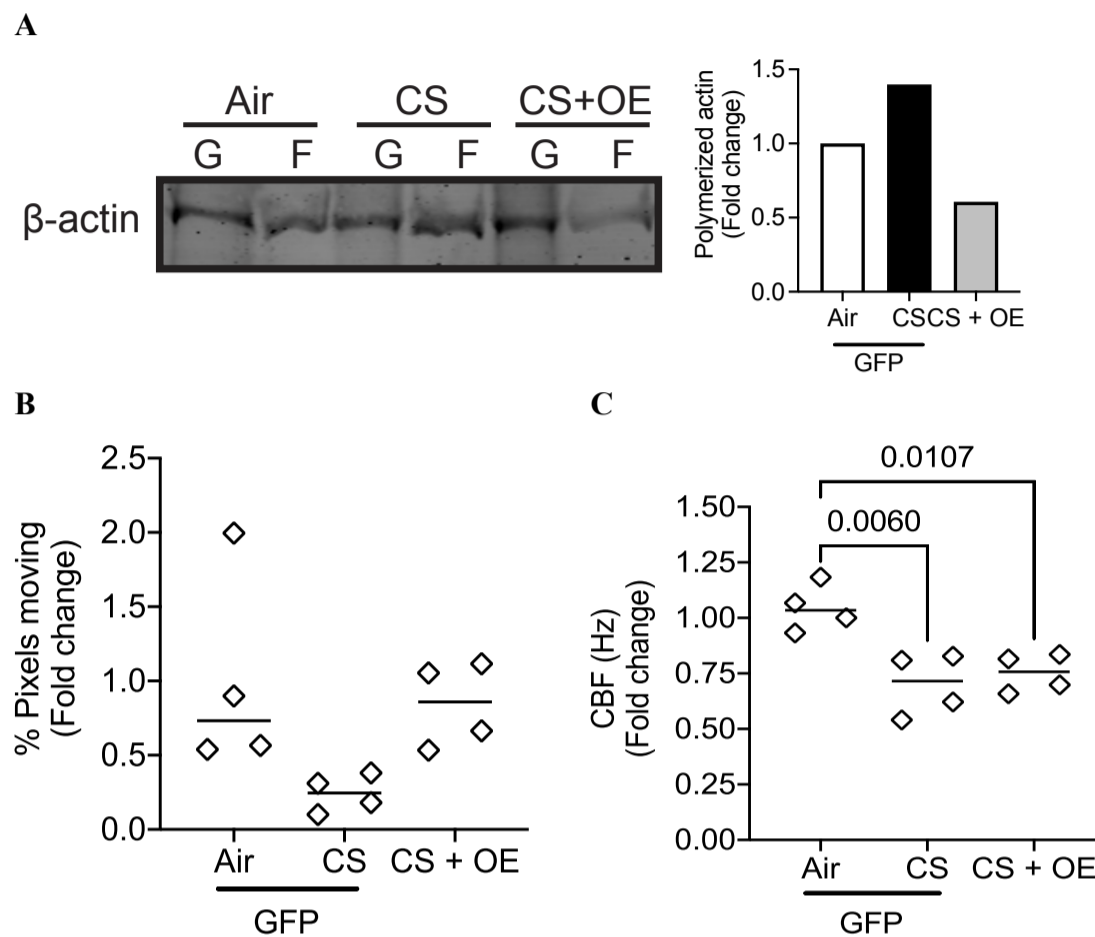

**Fig. S5. Cofilin-1 overexpression preserves G-actin levels despite CS exposure but does not fully restore ciliary function.** Non-diseased epithelia (NHBE) were transduced with Adenovirus – Ad-GFP (GFP) or Ad-GFP-h-CFL1 (OE) at  $1 \times 10^{10}$  PFU/mL prior to CS exposure. **(A)** Cofilin 1 overexpression in cigarette-smoke (CS) exposed epithelia decreased polymerized fraction due to CS exposure as shown in the representative western blot (left panel) (G: Globular actin and F: Filamentous actin) and quantification of polymerized actin (right panel). Data is representative of 2 inserts from 1 donor. **(B)** Cofilin 1 overexpression protects from the CS-induced loss of percentage of moving cilia (% pixels moving). and **(C)** Cofilin 1 overexpression in CS does not protect from the CS-induced decreased ciliary beat frequency (CBF). Data is representative of 4 inserts from 1 donor. Results are shown as median bars. Shapiro-Wilk normality test followed by Kruskal-Wallis test was performed.  $P$ -value  $< 0.05$  was considered statistically significant.

**Table S1. Demographic characteristics of donors**

A. Donor characteristics for age and gender matched donors

| Characteristics | NHBE1 | CHBE1                        | NHBE2 | CHBE2                        | NHBE3  | CHBE3  |
|-----------------|-------|------------------------------|-------|------------------------------|--------|--------|
| Age (in years)  | 69    | 67                           | 77    | 79                           | 71     | 64     |
| Gender          | Male  | Male                         | Male  | Male                         | Female | Female |
| Smoking history | --    | Ex-smoker<br>(25 pack-years) | --    | Ex-smoker<br>(20 pack-years) | Yes*   | Yes*   |

B. Donor characteristics for non-diseased airway epithelia exposed to air or cigarette-smoke

| Characteristics | NHBE      |                  |           |                  |
|-----------------|-----------|------------------|-----------|------------------|
|                 | ○ Donor 1 | □ Donor 2        | △ Donor 3 | ◇ Donor 4        |
| Age (in Years)  | 52        | 62               | 54        | 65               |
| Gender          | Male      | Female           | Male      | Female           |
| Smoker          | Yes*      | No               | Yes*      | No               |
| Ethnicity       | Caucasian | African American | Hispanic  | African American |

C. Donor characteristics for non-diseased airway epithelia treated with 2X epithelial to mesenchymal inducing media supplement

| Characteristics | NHBE      |                  |           |
|-----------------|-----------|------------------|-----------|
|                 | ○ Donor 1 | □ Donor 2        | ● Donor 3 |
| Age (in Years)  | 52        | 62               | 54        |
| Gender          | Male      | Female           | Male      |
| Smoker          | Yes*      | No               | Yes*      |
| Ethnicity       | Caucasian | African American | Hispanic  |

\*Pack-years data not available.

[NHBE, normal human bronchial epithelial cells; CHBE, COPD-derived human bronchial epithelial cells]

**Table S2. Primers for quantitative PCR analysis of gene transcript expression**

| Primer name                                    | Sequences                |                         | Product length |
|------------------------------------------------|--------------------------|-------------------------|----------------|
|                                                | Forward                  | Reverse                 |                |
| Housekeeping gene                              |                          |                         |                |
| GAPDH                                          | AACGGGAAGCTCACTGGCATG    | TCCACCACCTGTTGCTGTAG    | 304 bp         |
| Epithelial marker                              |                          |                         |                |
| CDH1                                           | CCCACCACGTACAAGGGTC      | CTGGGGTATTGGGGGCATC     | 94 bp          |
| Mesenchymal markers                            |                          |                         |                |
| CDH2                                           | CTCCATGTGCCGGATAGC       | CGATTTACCAGAAGCCTCTAC   | 92 bp          |
| SNAI1                                          | ACTATGCCGCGCTCTTTCT      | AGTCCTGTGGGGCTGATGTG    | 943 bp         |
| SNAI2                                          | TGGTTGCTTCAAGGACACAT     | GTTGCAGTGAGGGCAAGAA     | 66 bp          |
| TWIST2                                         | TCTGAAACCTGAACAACCTCAG   | CTGCTGTCCCTTCTCTCGAC    | 70 bp          |
| VIM                                            | GTTTCCCCTAAACCGCTAGG     | AGCGAGAGTGGCAGAGGA      | 68 bp          |
| ZEB1                                           | GCTAAGAAGTCTGGGAGGAT     | ATCCTGCTTCATCTGCCTGA    | 82 bp          |
| ZEB2                                           | TTTCAGGGAGAATTGCTTGA     | CACATGCATACATGCCACTC    | 124 bp         |
| Squamous metaplasia markers                    |                          |                         |                |
| IVL                                            | TGTTCCCTCCTCCAGTCAATACCC | ATTCCTCATGCTGTTCCCAGTGC | 227 bp         |
| p53                                            | GCCCAACAACACCAGCTCCT     | CCTGGGCATCCTTGAGTTCC    | 273 bp         |
| Transcription levels of actin binding proteins |                          |                         |                |
| CFL1                                           | GGTGCTCTTCTGCCTGAGTG     | TCTTGACAAAGGTGGCGTAG    | 116 bp         |
| PFN1                                           | GTTCGTCAACATCACGCCAG     | GTCCCGGATCACCGAACATT    | 112 bp         |
| ARPC2                                          | GAACCTCCTCTGGAGCTGAAAG   | GAACGTGTGGATCAGGTTGATGG | 132 bp         |
| ARPC3                                          | GAGCCTGGTTTTCCACTTCACG   | GTCTCAGTCCAGTCTCTTGCT   | 106 bp         |

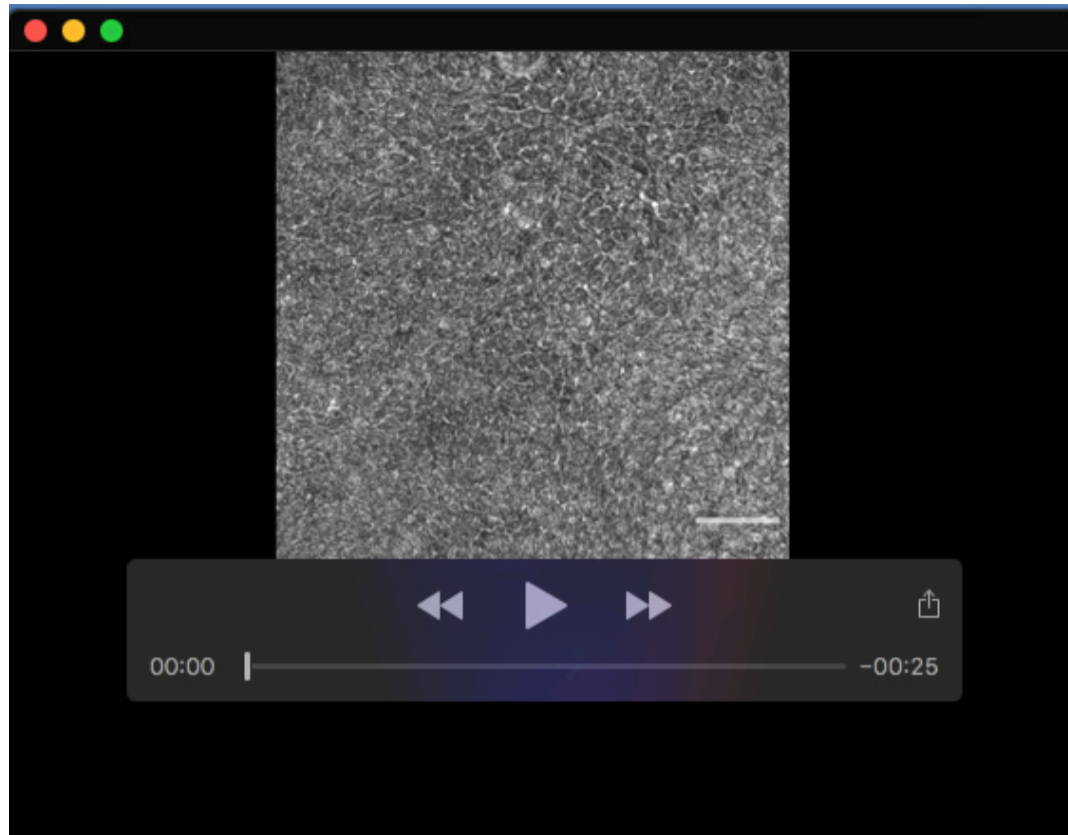

**Movie 1. Representative movie of the cell migration for air exposed non-diseased epithelia (NHBE) for 10 days.**

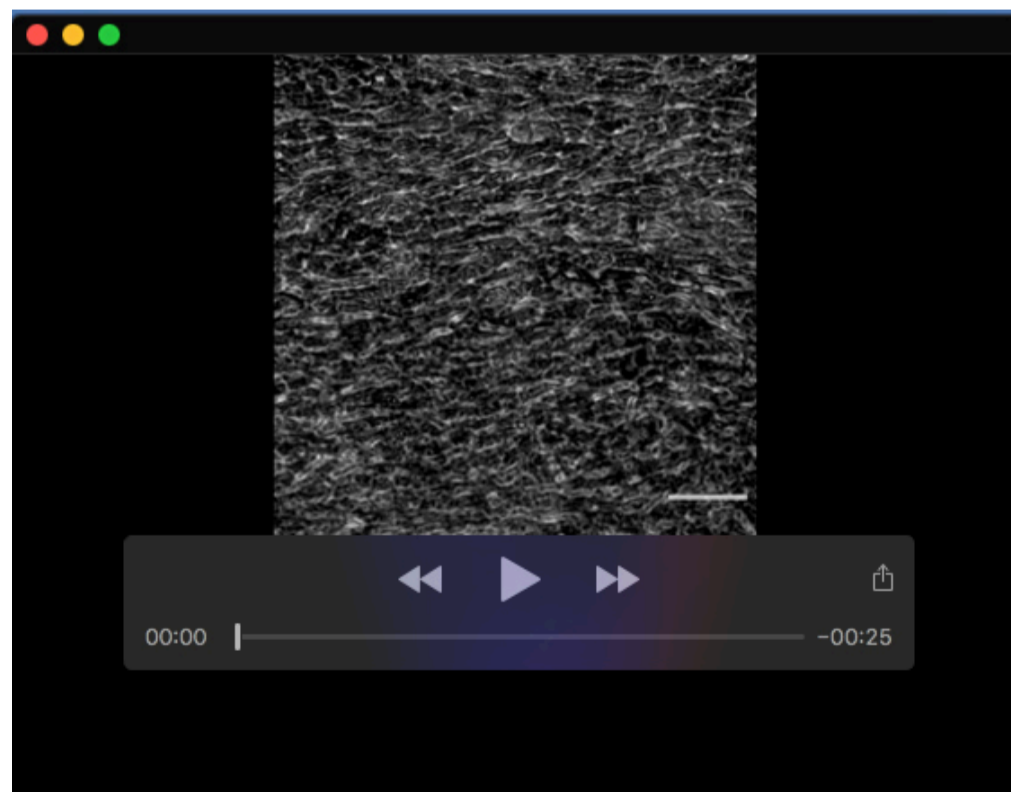

**Movie 2. Representative movie of the cell migration for air exposed COPD epithelia (CHBE) for 10 days.**

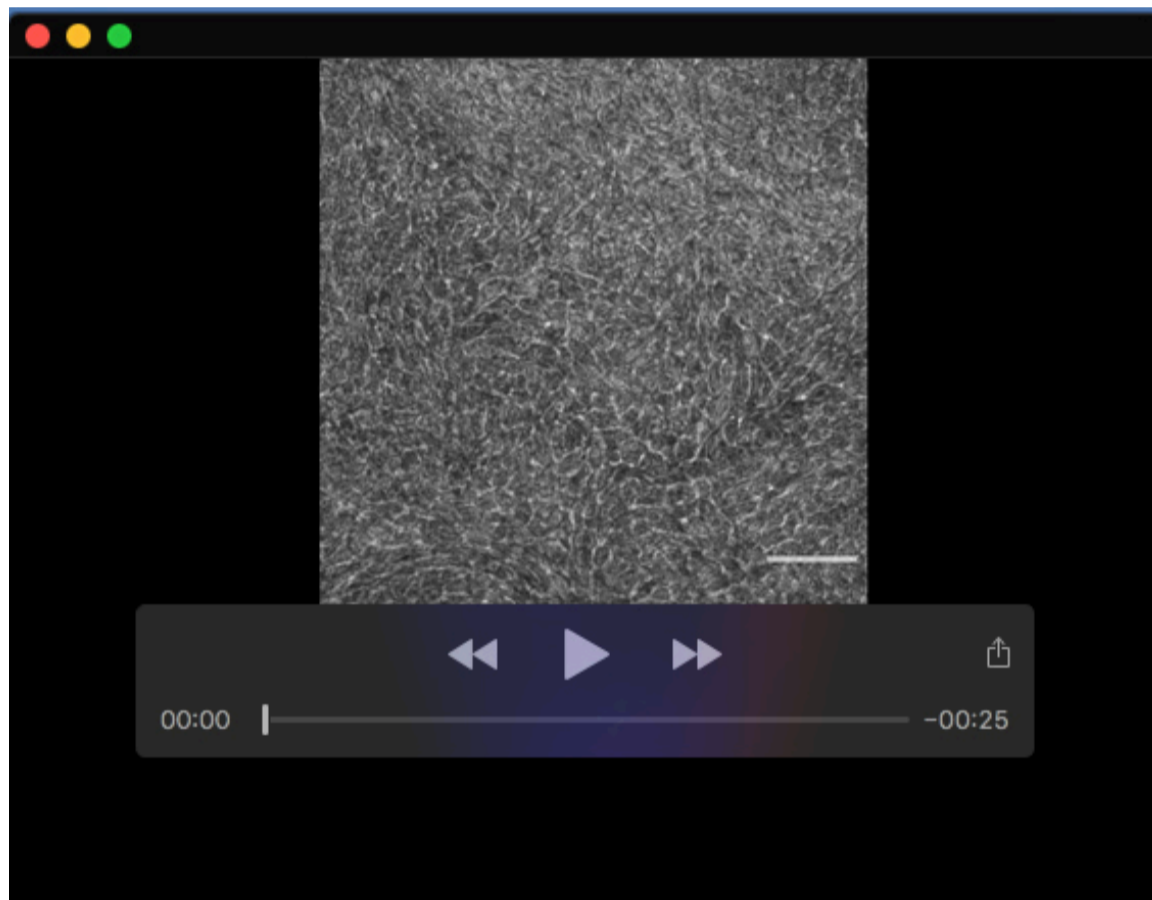

**Movie 3.** Representative movie of the cell migration for cigarette-smoke (CS) exposed NHBE for 10 days.
